# Supplementary material for: Effectiveness of a Pharmacogenetic Tool at Improving Treatment Efficacy in Major Depressive Disorder: A Meta-Analysis of Three Clinical Studies
Source: PubMed Central journal article supplement (PMC6781283; doi:10.3390/pharmaceutics11090453), 2019-09-02
Supplement: pharmaceutics-11-00453-s001.pdf [file pharmaceutics-11-00453-s001.pdf]

# Supplementary Materials: Effectiveness of a Pharmacogenetic Tool at Improving Treatment Efficacy in Major Depressive Disorder: A Meta-Analysis of Three Clinical Studies

Silvia Vilches, Miquel Tuson, Eduard Vieta, Enric Álvarez and Jordi Espadaler

**Table S1.** List of genes and polymorphisms analyzed.

| Gene symbol    | Gene name                                                        | Polymorphisms                                                                                                               |
|----------------|------------------------------------------------------------------|-----------------------------------------------------------------------------------------------------------------------------|
| <i>ABCB1</i>   | ATP binding cassette subfamily B member 1                        | rs2235048, rs11983225                                                                                                       |
| <i>AKT1</i>    | V-akt murine thymoma viral oncogene homolog 1                    | rs1130214                                                                                                                   |
| <i>BDNF</i>    | Brain-derived neurotrophic factor                                | rs6265                                                                                                                      |
| <i>CACNG2</i>  | Calcium channel, voltage-dependent, gamma subunit 2              | rs2284017                                                                                                                   |
| <i>CES1</i>    | Carboxylesterase 1                                               | rs71647871                                                                                                                  |
| <i>COMT</i>    | Catechol-O-methyltransferase                                     | rs4680                                                                                                                      |
| <i>CRHR1</i>   | Corticotropin releasing hormone receptor 1                       | rs4792888                                                                                                                   |
| <i>CYP1A2</i>  | Cytochrome P450 family 1 subfamily A member 2                    | *1, *1F                                                                                                                     |
| <i>CYP2B6</i>  | Cytochrome P450 family 2 subfamily B member 6                    | *1, *6                                                                                                                      |
| <i>CYP2C19</i> | Cytochrome P450 family 2 subfamily C member 19                   | *1, *2, *3, *5, *7, *8, *17, *27                                                                                            |
| <i>CYP2C9</i>  | Cytochrome P450 family 2 subfamily C member 9                    | *1, *2, *3, *6, *8, *27                                                                                                     |
| <i>CYP2D6</i>  | Cytochrome P450 family 2 subfamily D member 6                    | *1, *2, *3, *4, *5, *6, *7, *8, *9, *10, *11, *12, *14, *15, *17, *19, *20, *29, *30, *35, *40, *41, *69, *1xN, *2xN, *35X2 |
| <i>CYP3A4</i>  | Cytochrome P450 family 3 subfamily A member 4                    | *1, *22                                                                                                                     |
| <i>DDIT4</i>   | DNA damage inducible transcript 4                                | rs1053639                                                                                                                   |
| <i>DRD3</i>    | Dopamine receptor D3                                             | rs963468                                                                                                                    |
| <i>EPHX1</i>   | Epoxide hydrolase 1, microsomal (xenobiotic)                     | rs1051740                                                                                                                   |
| <i>FCHSD1</i>  | FCH and double SH3 domains 1                                     | rs456998                                                                                                                    |
| <i>GRIK2</i>   | glutamate receptor, ionotropic, kainate 2                        | rs2518224                                                                                                                   |
| <i>GRIK4</i>   | glutamate receptor, ionotropic kainate 4                         | rs1954787                                                                                                                   |
| <i>HLA-A</i>   | Major histocompatibility complex, class I, A                     | rs1061235                                                                                                                   |
| <i>HTR1A</i>   | 5-HT (serotonin) receptor 1A, G protein-coupled                  | rs10042486                                                                                                                  |
| <i>HTR2A</i>   | 5-HT (serotonin) receptor 2A, G protein-coupled                  | rs6311, rs6314, rs9316233                                                                                                   |
| <i>HTR2C</i>   | 5-HT (serotonin) receptor 2C, G protein-coupled                  | rs1414334                                                                                                                   |
| <i>LPHN3</i>   | Latrophilin 3                                                    | rs6551665                                                                                                                   |
| <i>NEFM</i>    | Neurofilament, medium polypeptide                                | rs1379357, rs1457266                                                                                                        |
| <i>OPRM1</i>   | Opioid receptor, mu 1                                            | rs1799971                                                                                                                   |
| <i>RGS4</i>    | Regulator of G-protein signaling 4                               | rs2661319                                                                                                                   |
| <i>RPTOR</i>   | Regulatory associated protein of MTOR, complex 1                 | rs7211818                                                                                                                   |
| <i>SLC6A4</i>  | Solute carrier family 6 (neurotransmitter transporter), member 4 | 5-HTTLPR                                                                                                                    |
| <i>UGT2B15</i> | UDP glucuronosyltransferase 2 family, polypeptide B15            | rs1902023                                                                                                                   |

a

**Results Report NFGE**

Requested by Dr: [redacted] Request date: 05/21/2015  
 Sample Code: [redacted] Analysis #: [redacted] Entry date: 05/22/2015

**1. Genetic results** | **2. Patient information** | **3. Final result**  
 Patient genetics+info

Results in table format View as list

An initial interpretation of the results obtained from the patients genetic profile is displayed in a table below. For each drug examined, the result is indicated according to the following code:

|                                                                                                                                                                                |                                                                                                                                                                     |
|--------------------------------------------------------------------------------------------------------------------------------------------------------------------------------|---------------------------------------------------------------------------------------------------------------------------------------------------------------------|
| <span style="border: 1px solid black; padding: 2px;">Standard</span> ▶ No genetic variants relevant to the treatment have been found.                                          | <span style="background-color: yellow; border: 1px solid black; padding: 2px;"></span> ▶ Need for drug dose monitoring and/or less likelihood of positive response. |
| <span style="background-color: green; border: 1px solid black; padding: 2px;"></span> ▶ Increased likelihood of positive response and/or lower risk of adverse drug reactions. | <span style="background-color: red; border: 1px solid black; padding: 2px;"></span> ▶ Increased risk of adverse drug reactions.                                     |

| Antidepressants |          |               |          |             |  |
|-----------------|----------|---------------|----------|-------------|--|
| Amitriptyline   |          | Bupropion     | Standard | Citalopram  |  |
| Clomipramine    |          | Desipramine   |          | Doxepine    |  |
| Duloxetine      |          | Escitalopram  |          | Fluoxetine  |  |
| Fluvoxamine     |          | Imipramine    |          | Mianserin   |  |
| Mirtazapine     |          | Nortriptyline |          | Paroxetine  |  |
| Sertraline      | Standard | Trimipramine  |          | Venlafaxine |  |

| Antipsychotics |  |              |          |               |  |
|----------------|--|--------------|----------|---------------|--|
| Aripiprazole   |  | Clozapine    |          | Haloperidol   |  |
| Olanzapine     |  | Paliperidone |          | Perphenazine  |  |
| Pimozide       |  | Quetiapine   | Standard | Risperidone   |  |
| Thioridazine   |  | Ziprasidone  | Standard | Zuclopentixol |  |

| Stabilizers and anticonvulsants |          |               |          |               |          |
|---------------------------------|----------|---------------|----------|---------------|----------|
| Carbamazepine                   |          | Clobazam      |          | Clonazepam    |          |
| Lamotrigine                     |          | Levetiracetam |          | Lithium*      | Standard |
| Lorazepam                       | Standard | Oxcarbazepine |          | Phenobarbital |          |
| Phenytoin                       |          | Pregabalin    | Standard | Topiramate    |          |
| Valproic Acid                   |          | Vigabatrin    |          |               |          |

| Others      |          |            |          |                 |          |
|-------------|----------|------------|----------|-----------------|----------|
| Atomoxetine |          | Methadone  | Standard | Methylphenidate |          |
| Naloxone    | Standard | Naltrexone | Standard | Pramipexol      | Standard |

b

| Antidepressants |          |               |          |            |  |
|-----------------|----------|---------------|----------|------------|--|
| Amitriptyline   |          | Bupropion     | Standard | Citalopram |  |
| Clomipramine    |          | Desipramine   |          | Citalopram |  |
| Duloxetine      |          | Escitalopram  |          |            |  |
| Fluvoxamine     |          | Imipramine    |          |            |  |
| Mirtazapine     |          | Nortriptyline |          |            |  |
| Sertraline      | Standard | Trimipramine  |          |            |  |

**Analysis result**

- Higher likelihood of positive response to treatment (ABCB1)
- Slight increase in the likelihood of positive response (GRIK4)

**Recommendation**

The analysis indicates the presence of factors associated with a higher likelihood of positive response to treatment (ABCB1, GRIK4), and therefore, if applicable, use of this drug is recommended in preference to other similar alternatives.

**Figure S1.** Example of a Neuropharmagen® pharmacogenomics interpretative report for one de-identified study subject, showing (a) the color-coding classification of drugs and (b) detailed information for one of the drugs.
